# Supplementary material for: Meta-analysis of preclinical studies of mesenchymal stromal cells to treat rheumatoid arthritis
Source: PubMed Central journal article supplement — eBioMedicine. 2019 Sep 6;47:563–77. doi: 10.1016/j.ebiom.2019.08.073 (PMC6796567; doi:10.1016/j.ebiom.2019.08.073), 2019-09-06
Supplement: mmc1.pdf [file mmc1.pdf]

## Meta-analysis of Preclinical Studies of Mesenchymal Stromal Cells to Treat Rheumatoid Arthritis

Linan Liu<sup>1,2,3,4,\*,#</sup>, Chi W. Wong<sup>1,2,3,4,\*</sup>, Menglu Han<sup>1,2,3,4</sup>, Henry P. Farhoodi<sup>1,2,3,4</sup>, Guangyang Liu<sup>1,5</sup>, Yongjun Liu<sup>1,2,3,4</sup>, Wenbin Liao<sup>6,†</sup>, Weian Zhao<sup>1,2,3,4,7,†</sup>

<sup>1</sup>Sue and Bill Gross Stem Cell Research Center, 845 Health Sciences Road, University of California-Irvine, Irvine, CA 92697, USA.

<sup>2</sup>Department of Pharmaceutical Sciences, University of California-Irvine, Irvine, CA 92697, USA.

<sup>3</sup>Chao Family Comprehensive Cancer Center, University of California-Irvine, Irvine, CA 92697, USA.

<sup>4</sup>Edwards Life Sciences Center for Advanced Cardiovascular Technology, University of California-Irvine, Irvine, CA 92697, USA.

<sup>5</sup>Department of Surgery, University of California-Irvine, Irvine, CA 92697, USA.

<sup>6</sup>Baylx, Inc., 1 Technology Dr., C511, Irvine, CA 92618, USA.

<sup>7</sup>Departments of Biomedical Engineering and Biological Chemistry, University of California-Irvine, Irvine, CA 92697, USA.

\*These authors contributed equally to this work.

# This author is currently affiliated with Baylx, Inc.

†Corresponding authors. WZ: weianz@uci.edu. WL: wliao@baylxinc.com

This work is supported by NIH (1DP2CA195763) and Baylx Inc: BI-206512. H.P.F is in part supported by a pre-doctoral fellowship from the National Institute of Neurological Disorders and Stroke (NINDS/NIH) Training Grant (Award# NS082174).

# **SUPPLEMENTARY MATERIALS**

## MATERIALS AND METHODS

**Literature search and inclusion criteria.** This meta-analysis review was conducted according to the preferred reporting items for systematic reviews and meta-analysis (PRISMA) guidance(50). We conducted a comprehensive literature search for articles evaluating the therapeutic function of MSC in rheumatoid arthritis. The search terms used were sufficiently broad to capture the majority of the published data using MSC to treat animal models of arthritis. The search terms used were (mesenchymal OR mesenchymal stem cell OR mesenchymal stromal cell OR MSC) AND (rheumatoid arthritis OR rheumatoid OR arthritis OR RA). The electronic search strategy excluded non-English articles, and all studies included in this meta-analysis review were done in animal models of rheumatoid arthritis treated using non-genetic modified native MSC. Only the data documented therapeutic effects on arthritis, which means MSC were administered at least one day after the initial RA induction, were included in our study. Studies with high risk of any bias were excluded from the meta-analysis if they scored “No” on any one question stated in the SYRCLE’s risk of bias tool (below). In addition, studies that failed to present sample sizes, standard deviations, or missed numerical/graphical results required for evaluating the effect sizes objectively, were also excluded in the parametric meta-analysis.

**Data extraction.** Data were extracted from all available sources in each paper, including text and graphs. When only graphical presentation was available, values for mean and SD or SEM were obtained using GraphClick (Arizona Software, Phoenix, AZ) under high magnification by two independent investigators.

**Evaluating the risk of bias.** To evaluate the quality of the studies and risk of any bias, two independent investigators used the SYRCLE’s risk of bias tool, which includes 10 defined criteria: (1) sequence generation, (2) baseline characteristics, (3) allocation concealment, (4) random housing, (5) blinding against performance bias, (6) random outcome assessment, (7) blinding against detection bias, (8) incomplete outcome data, (9) selective outcome reporting, and (10) other sources of biases including contamination and inappropriate influence of funders(49). In order to assign a judgment of low, high, or unclear risk of bias to each item mentioned in the tool, the following signaling questions were used: Q1: Was the allocation sequence adequately generated and applied? Q2: Were the groups similar at baseline or were they adjusted for confounders in the analysis? Q3: Was the allocation adequately concealed? Q4: Were animals randomly housed during the experiment? Q5: Were the caregivers and/or investigators blinded from knowledge of which intervention each animal received during the experiment? Q6: Were animals selected at random for outcome assessment? Q7: Was the outcome assessor blinded? Q8: Were incomplete outcome data adequately addressed? Q9: Are reports of the study free of selective outcome reporting? Q10: Was the study apparently free of other problems that could result in high risk of bias? A “yes” judgment indicates a low risk of bias, a “no” judgment indicates high risk of bias, and if insufficient details were reported to assess the risk of bias properly, the judgment of bias was recorded as “unclear”(49). As suggested in SYRCLE’s risk of bias tool, we focused on evaluating the potential risk of bias instead of calculating the quality score for each article.

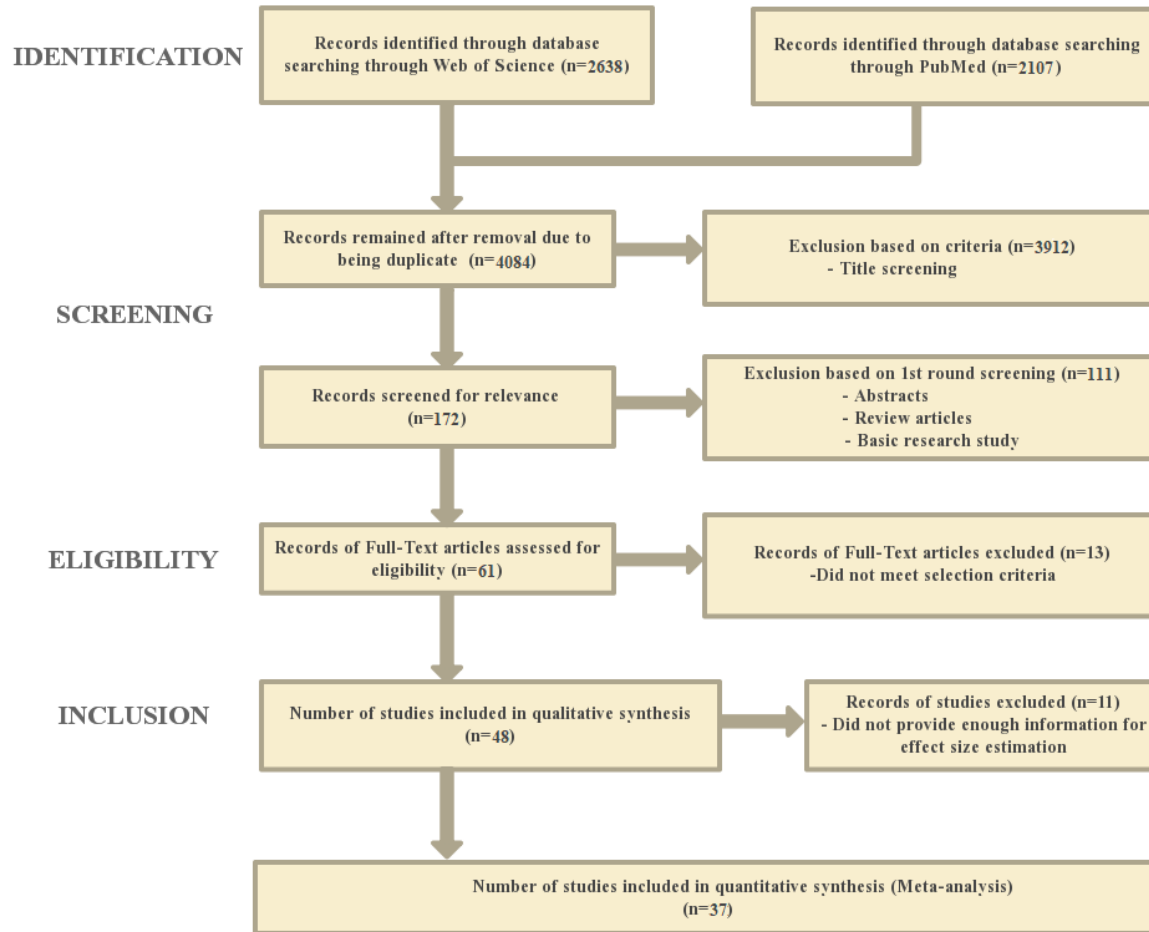

**Figure S1**

Flowchart of meta-analysis search and review process, conducted in accordance with PRISMA (preferred reporting items for systematic reviews and meta-analyses) statement criteria. Down arrows indicate the progression of studies that passed the previous criteria (number passed in parentheses). Side arrows indicate the number of studies excluded at each stage, and why they were excluded.

## Quality Assessment

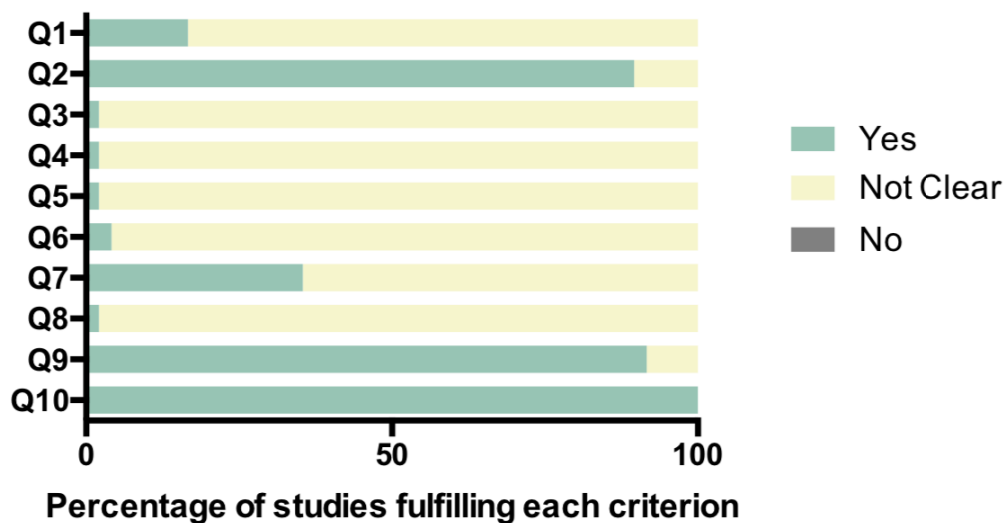

**Figure S2**

Quality assessment of literature. Horizontal axis indicates percentage of answers to the questions in SYRCLE's risk of bias tool. Green indicates "Yes"; dark gray indicates "No"; and yellow indicates "Not clear".

**a**

**Normalised Mean Differences of Histological Score (Bone Erosion)**

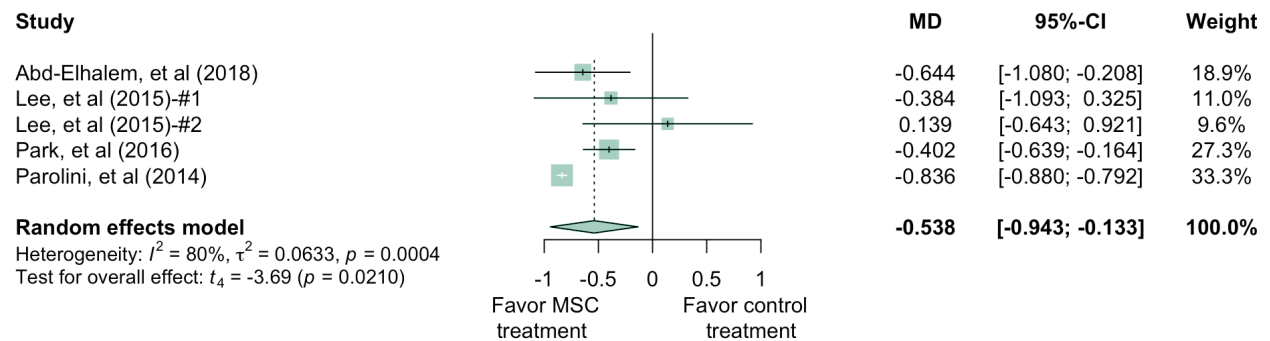

**b**

**Normalised Mean Differences of Histological Score (Cartilage Damage)**

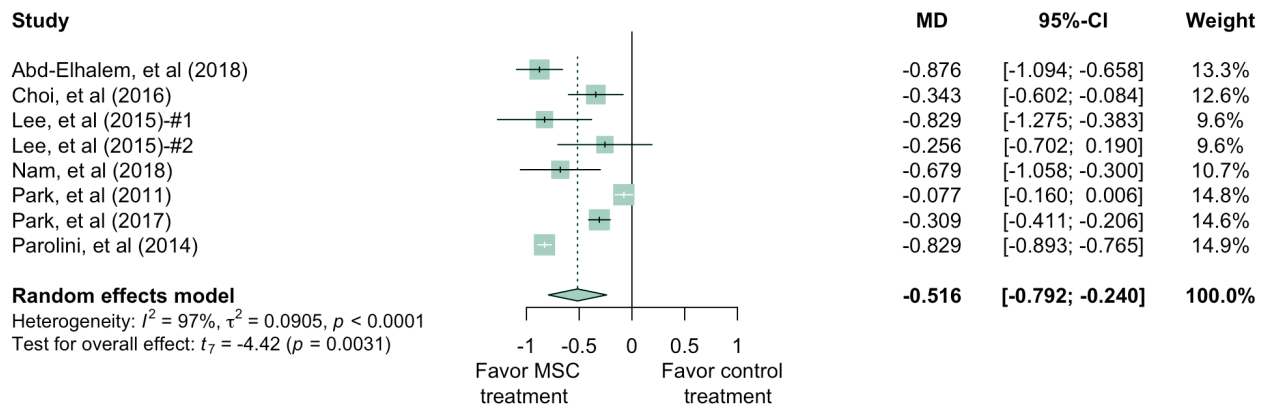

**c**

**Normalised Mean Differences of Histological Score (Inflammation)**

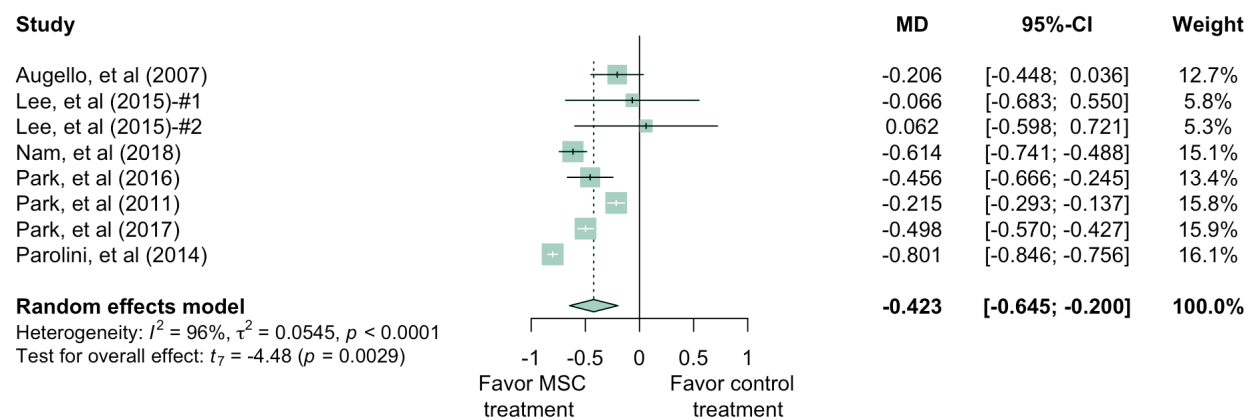

**Figure S3**

Forest plots showing the normalised mean difference (MD) and 95% CI for histological scores with a subgroup of (a) bone erosion; (b) cartilage damage; (c)inflammation. The graphs were

generated using the *meta* package in R. All results have been normalised with the sham control group as described in the methods. For all the plots, the vertical line indicates no effect, left hand side indicates favouring MSC treatment while right side indicates favouring PBS control treatment. The size of the box indicates the weighting of each study, and the thin horizontal whisker indicates the 95% CI. Random-effects model was used to summarise the effect sizes. Heterogeneity is denoted by the  $I^2$  and  $\tau^2$ .

**a**

**Standardised Mean Differences of Clinical Score Increments (General)**

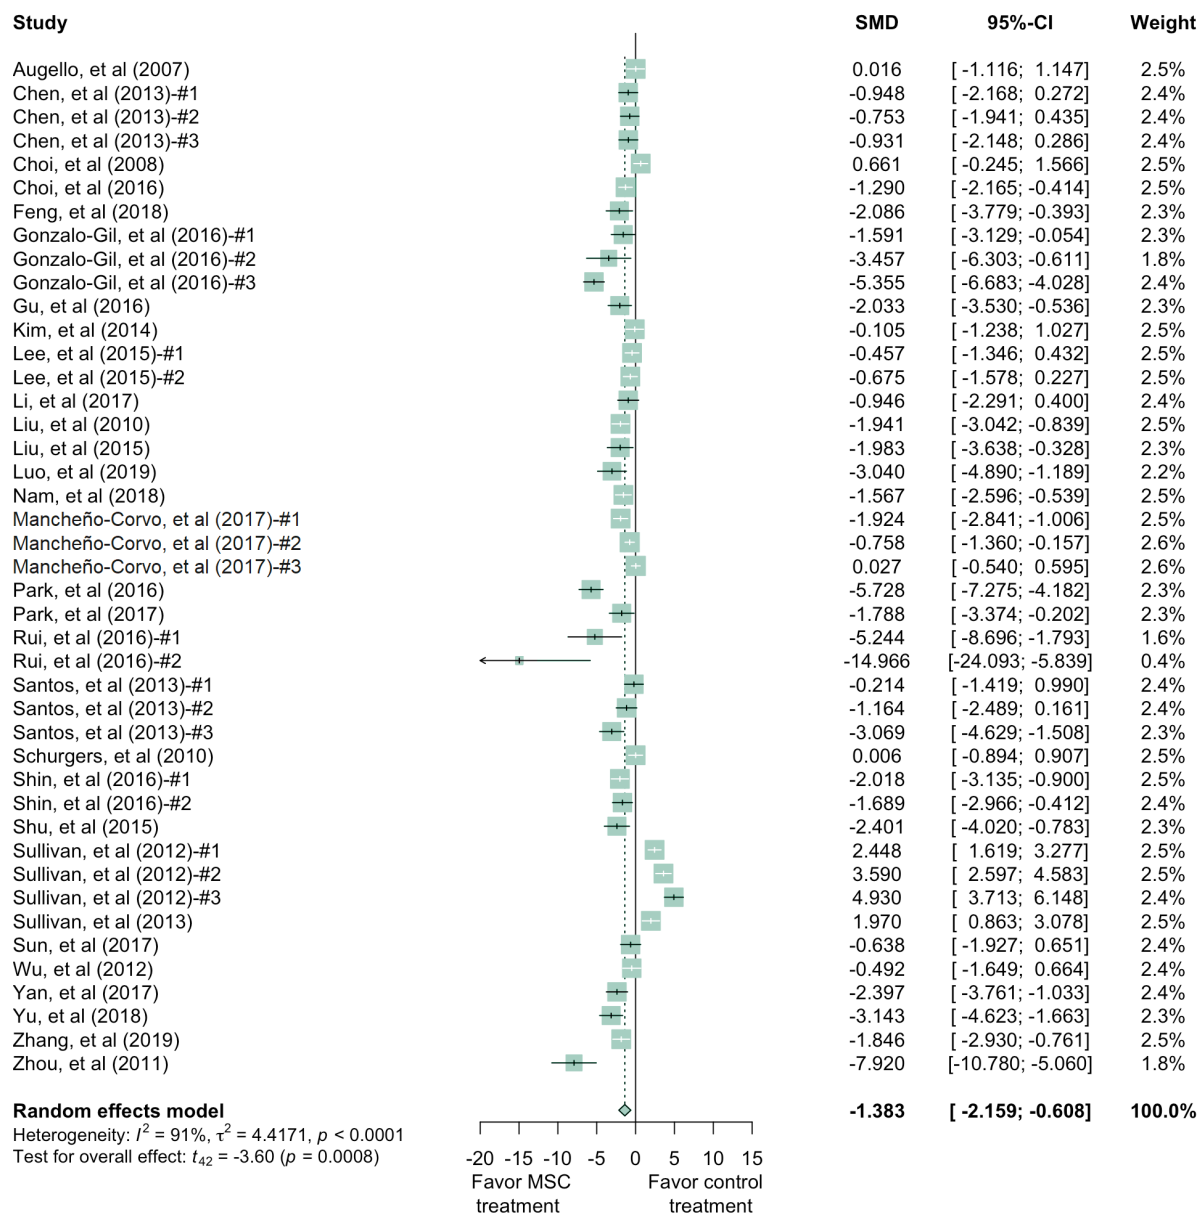



**b**

**Standardised Mean Difference of Histological Score (General)**

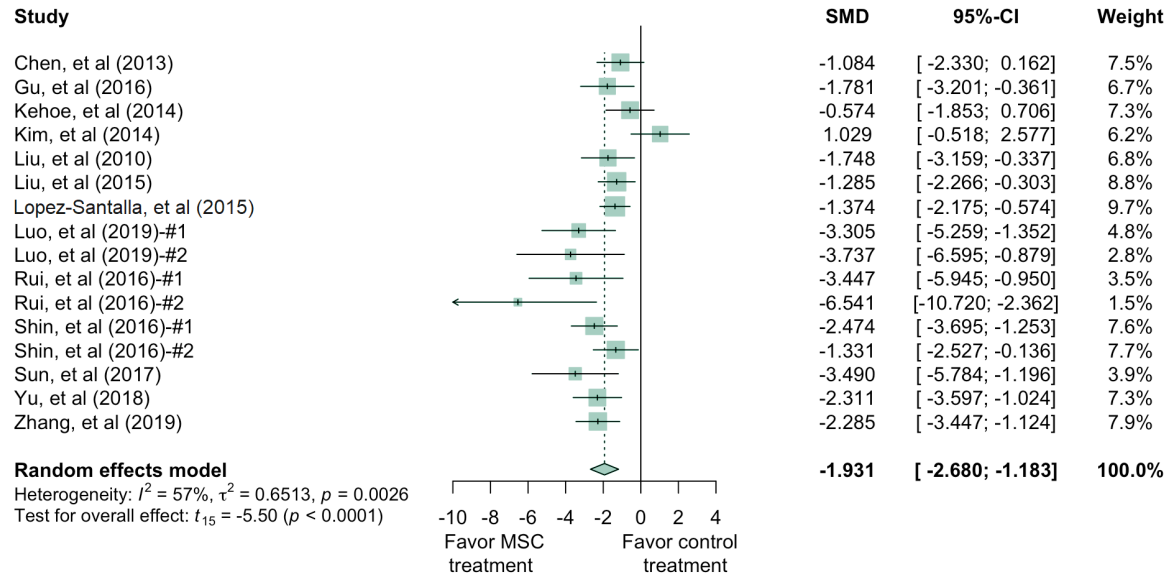

**c**

**Standardised Mean Differences of Paw Thickness Increments**

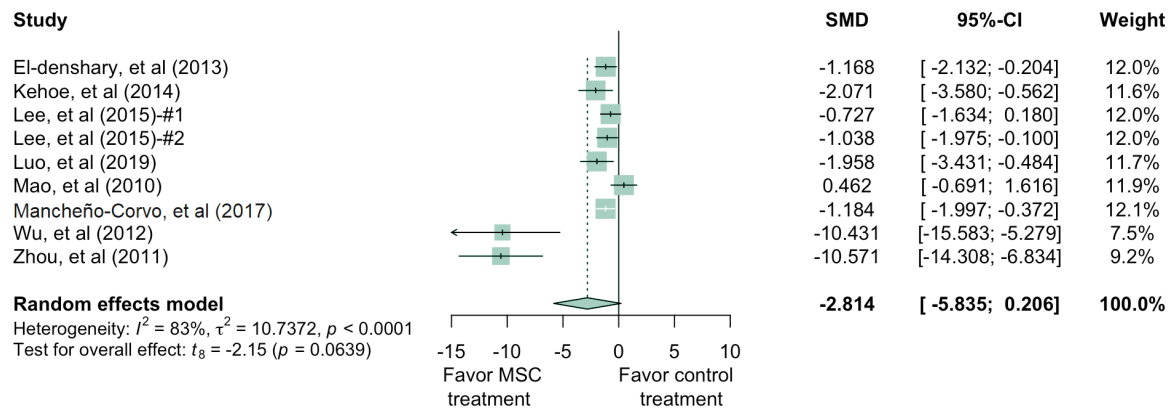

**Figure S4**

Forest plots showing the standardised mean difference (SMD) and 95% CI for (a) clinical score, (b) histological score, (c) paw thickness for each study included in the meta-analysis. The graphs were generated using the *meta* package in R. All results have been normalised with sham control group as described in the methods. For all the plots, the vertical line indicates no effect, left hand side indicates favouring MSC treatment while right side indicates favouring PBS control treatment. The size of the box indicates the weighting of each study, and the thin horizontal whisker indicates the 95% CI. Random-effects model was used to summarise the effect sizes. Heterogeneity is denoted by the  $I^2$  and  $\tau^2$ .

Normalised Mean Differences of Clinical Score Increments (MSC Donor Species + Tissue of Origin)

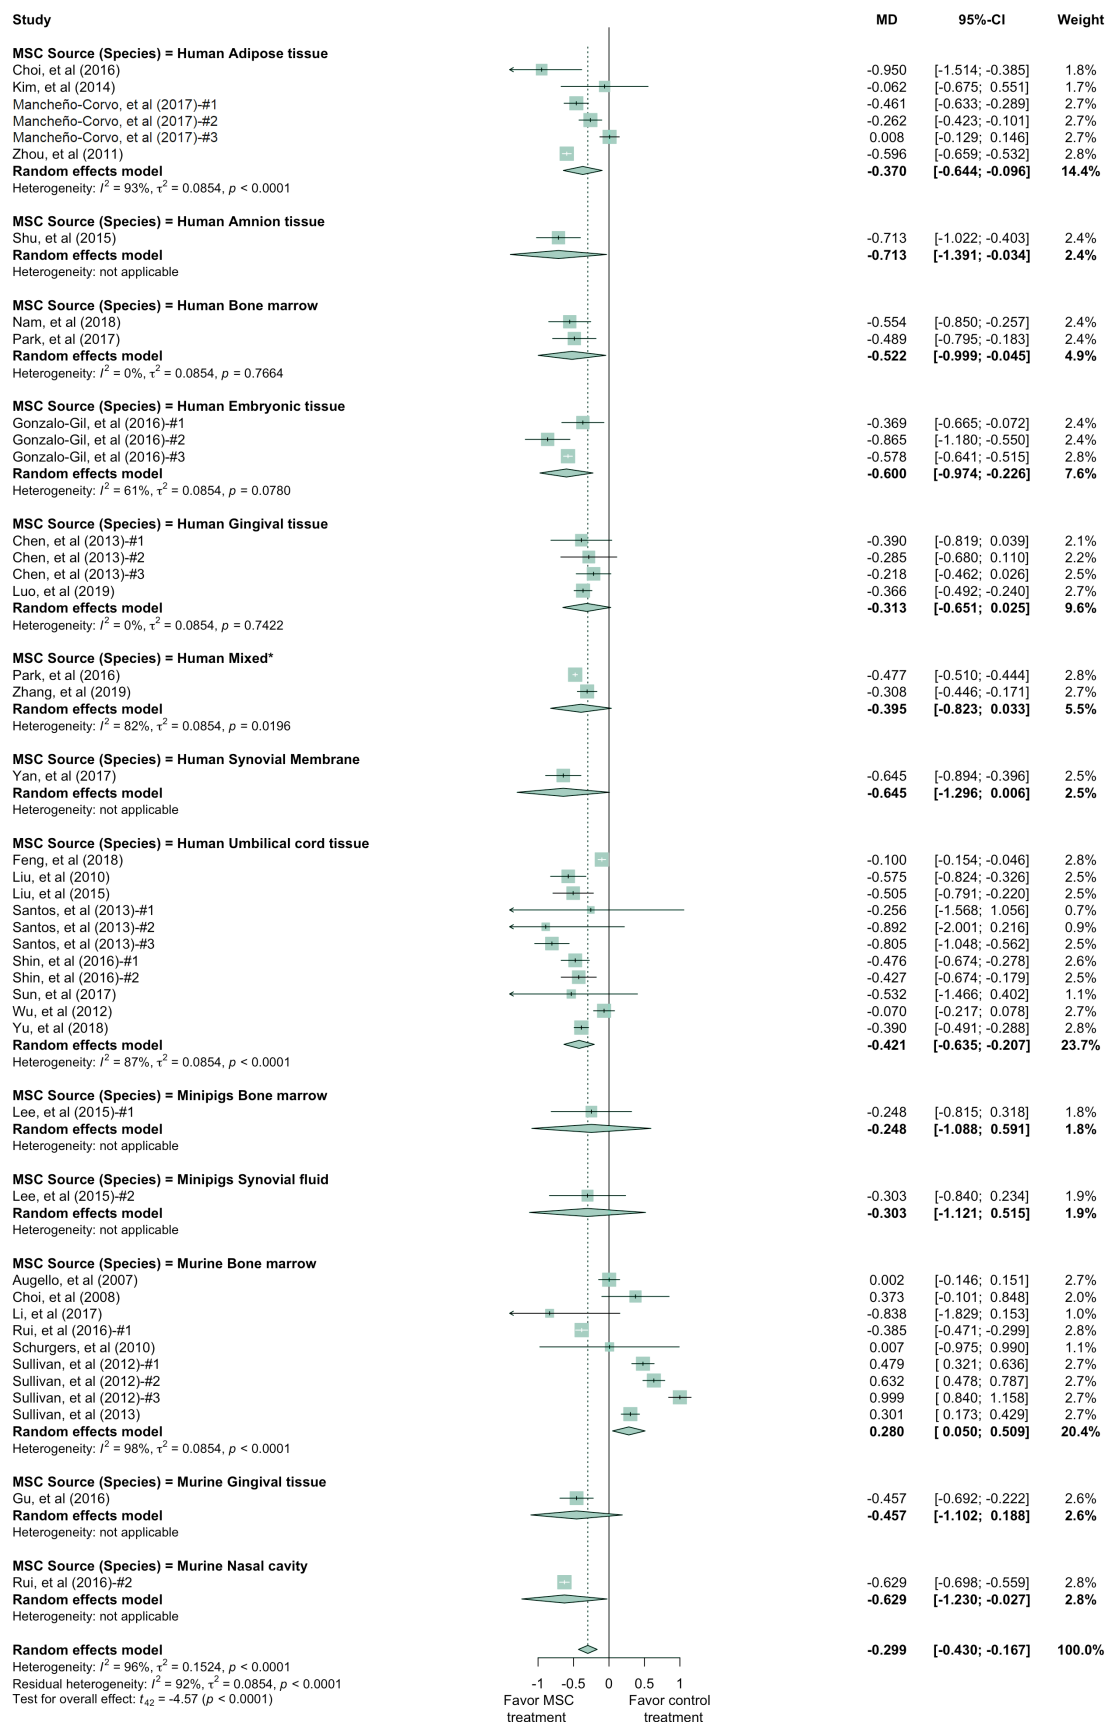

**Figure S5**

Forest plots showing the normalised mean difference (MD) and 95% CI for two important MSC donor species, human and mouse, and tissue of origin. The graphs were generated using the *meta* package in R. All results have been normalised with the sham control group as described in the methods. For all the plots, the vertical line indicates no effect, left hand side indicates favouring MSC treatment while right side indicates favouring PBS control treatment. The size of the box indicates the weighting of each study, and the thin horizontal whisker indicates the 95% CI. Random-effects model was used to summarise the effect sizes. Heterogeneity is denoted by the  $I^2$  and  $\tau^2$ .

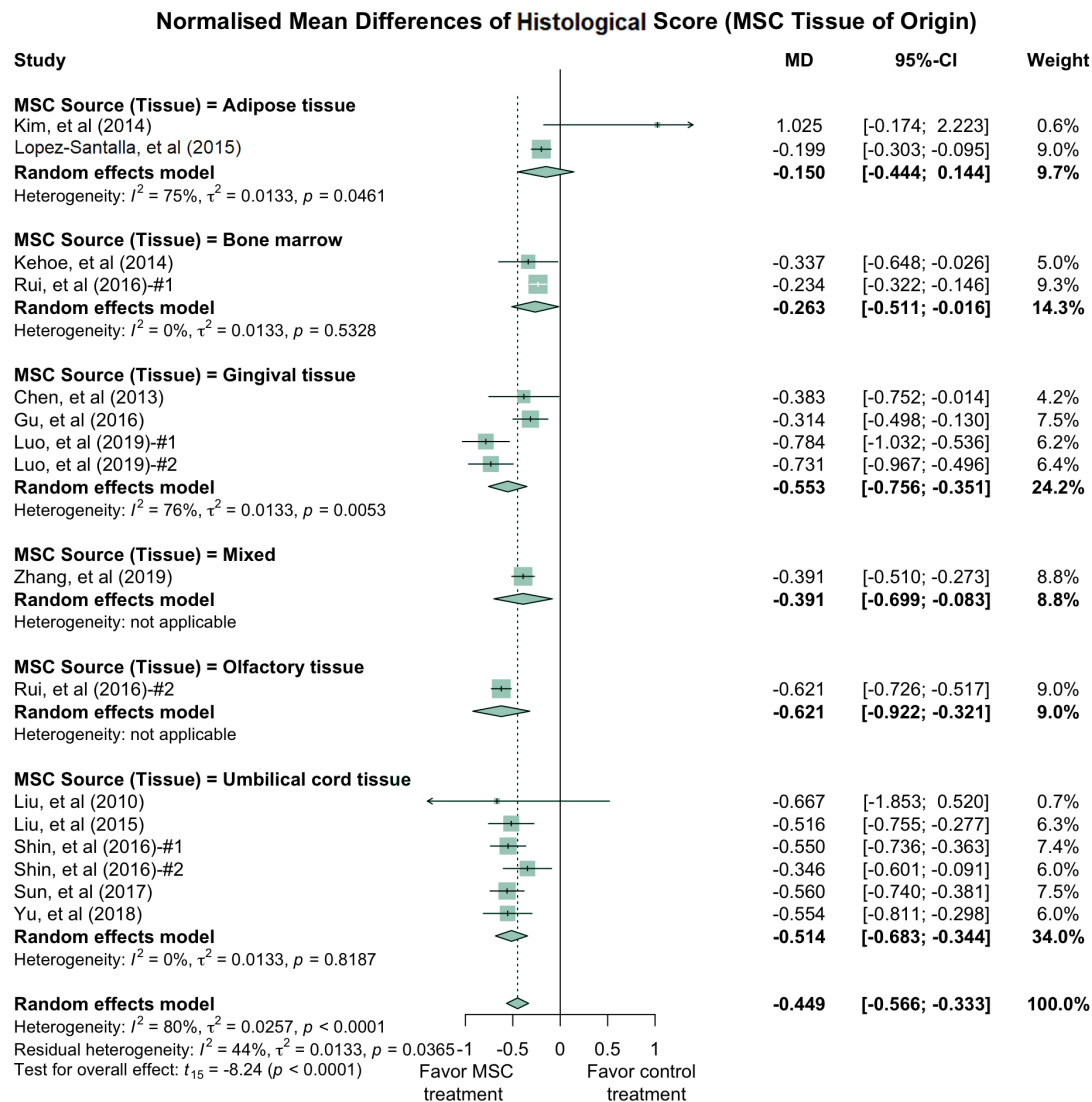

**Figure S6**

A forest plot showing the normalised mean difference (MD) and 95% CI of histological score of MSC tissue of origin. The graph was generated using the *meta* package in R. All the results have

been normalised with the sham control group as described in the methods. The vertical line indicates no effect, left hand side indicates favouring MSC treatment while right side indicates favouring control treatment. The size of the box indicates the weighting of each study, and the thin horizontal whisker indicates the 95% CI. Random-effects model was used to summarise the effect sizes. Heterogeneity is denoted by the  $I^2$  and  $\tau^2$ . Mixed indicates the treatment arm contains more than one type of MSC tissue of origin.

**a**

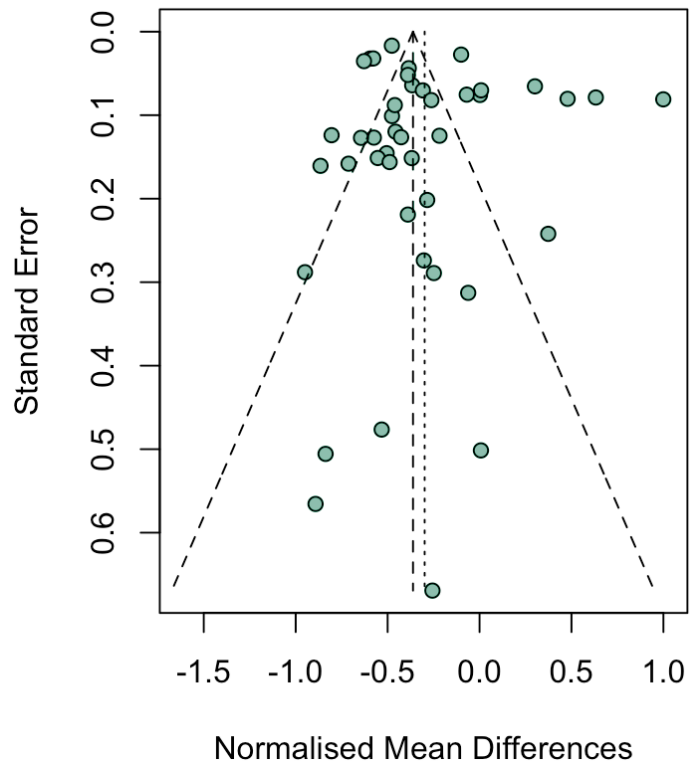

**b**

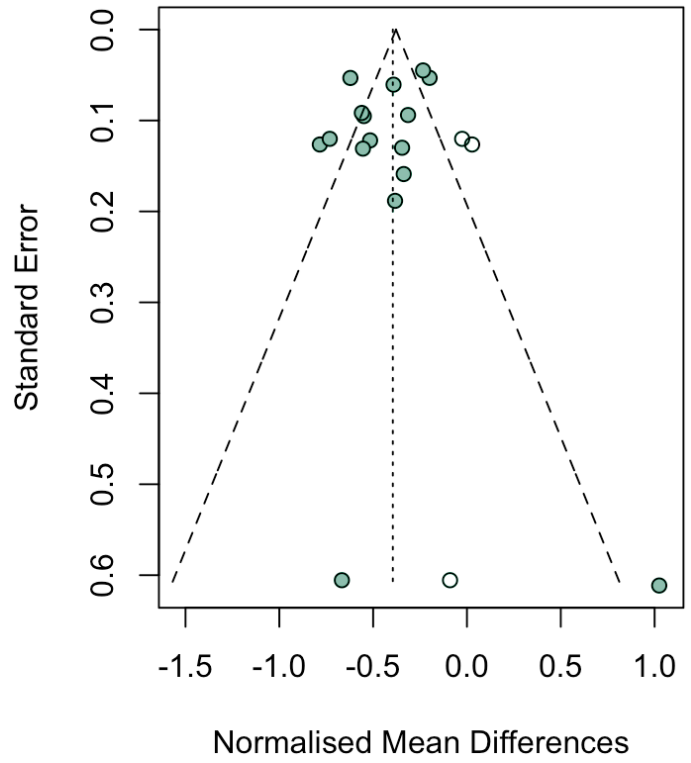

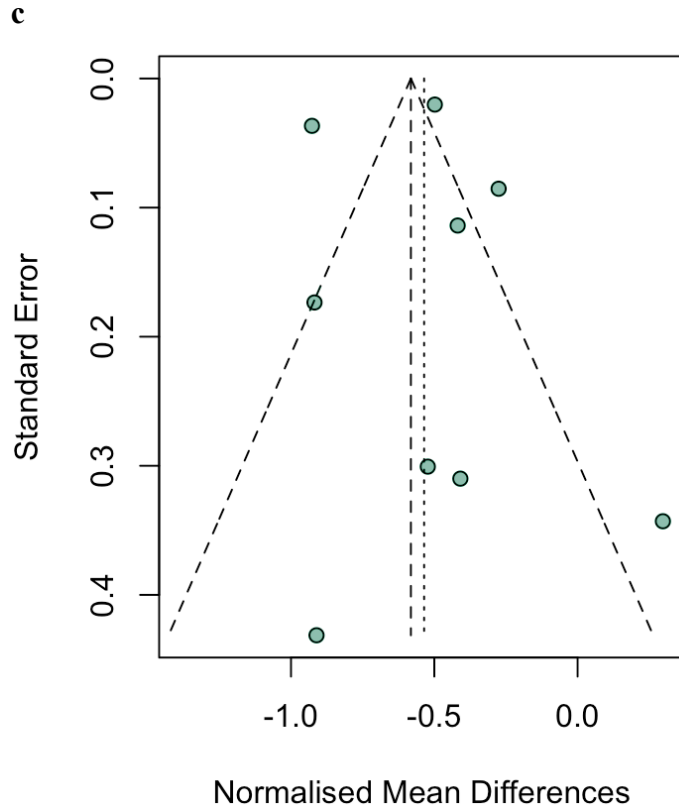

**Figure S7**

Funnel plot for (a) clinical score, (b) histological score and (c) paw thickness, after trim-and-fill correction. Each dot represents a study with the y-axis representing study quality and the x-axis representing the study results. The original studies are denoted by the green dots, while white dots represent the hypothetical studies added into the analysis.

### Normalised Mean Differences of Autoantibody Levels (IgG)

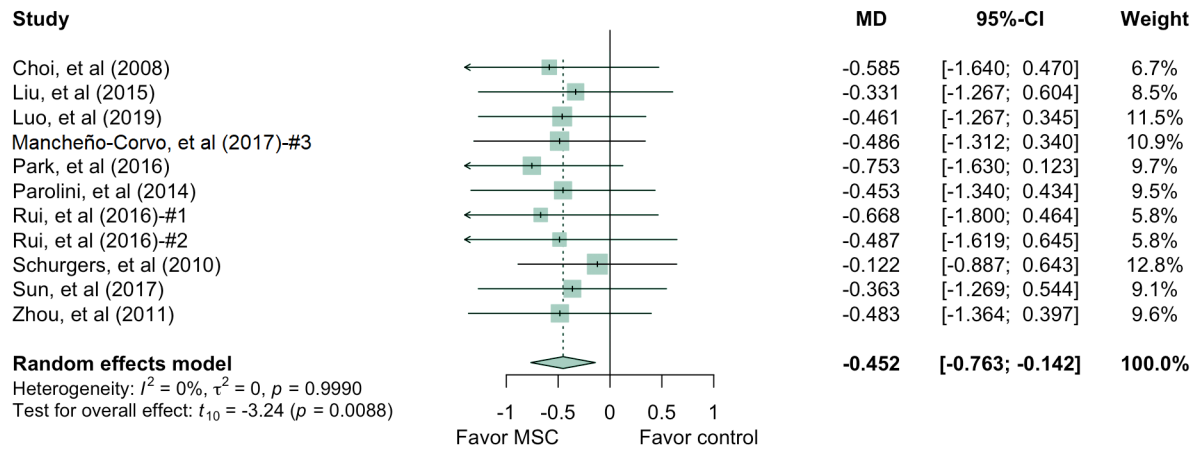

**Figure S8**

Forest plots showing the normalised mean difference (MD) and 95% CI for clinical scores with a subgroup of autoantibody levels (IgG). The graphs were generated using the *meta* package in R. All results have been normalised with the sham control group as described in the methods. For all the plots, the vertical line indicates no effect, left hand side indicates favouring MSC treatment while right side indicates favouring PBS control treatment. The size of the box indicates the weighting of each study, and the thin horizontal whisker indicates the 95% CI. Random-effects model was used to summarise the effect sizes. Heterogeneity is denoted by the  $I^2$  and  $\tau^2$ .

### Standardised Mean Differences of Autoantibody Levels (IgG)

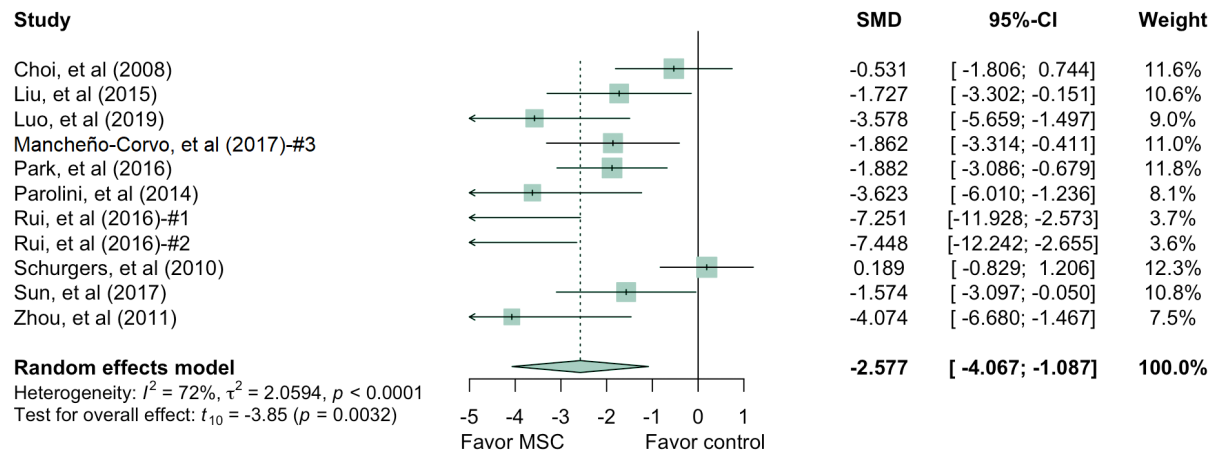

**Figure S9**

Forest plots showing the standardised mean difference (SMD) and 95% CI for clinical score, for each study included with subgroup of autoantibody levels (IgG) in the meta-analysis. The graphs were generated using the *meta* package in R. All results have been normalised with sham control group as described in the methods. For all the plots, the vertical line indicates no effect, left hand

side indicates favouring MSC treatment while right side indicates favouring PBS control treatment. The size of the box indicates the weighting of each study, and the thin horizontal whisker indicates the 95% CI. Random-effects model was used to summarise the effect sizes. Heterogeneity is denoted by the  $I^2$  and  $\tau^2$ .



## Tables

Table S1: Autoantibodies summary of the pre-clinical studies using MSC to treat RA in this study

| Author (year)                              | Arm | <i>P</i> < 0.05 | MSC favor? | Origin     | Donor  | Control    | Transplant type | Treatment protocol              | Rcpt  | Target                  |
|--------------------------------------------|-----|-----------------|------------|------------|--------|------------|-----------------|---------------------------------|-------|-------------------------|
| Zhou, et al (2011) <sup>S1</sup>           | 1   | Y               | Y          | AD         | Human  | PBS/ Other | Xenogenic       | CIA, no booster, IV, Multiple   | Mouse | IgG, IgG2a              |
| #Garimella, et al (2015) <sup>S2</sup>     | 1   | Y               | Y          | AD         | Murine | PBS        | Autologous      | CIA, with booster, IP, Single   | Mouse | IgG                     |
| #Chen, et al (2009) <sup>S6</sup>          | 1   | Y               | N          | BM         | Murine | Nil        | Autologous      | CIA, with booster, IV, Single   | Mouse | IgG                     |
| Rui, et al (2016) <sup>S13</sup>           | 1   | Y               | Y          | BM         | Murine | PBS        | Allogeneic      | CIA, with booster, IV, Multiple | Mouse | IgG                     |
|                                            | 2   | Y               | Y          | Other (OE) | Murine | PBS        | Allogeneic      | CIA, with booster, IV, Multiple | Mouse | IgG                     |
| Park, et al (2016) <sup>S20</sup>          | 1   | Y               | Y          | BM         | Human  | Other      | Xenogenic       | CIA, with booster, IV, Multiple | Mouse | IgG                     |
|                                            | 2   | Y               | Y          | BM         | Human  | Other      | Xenogenic       | CIA, with booster, IV, Multiple | Mouse | IgG                     |
|                                            | 3   | Y               | Y          | BM         | Human  | Other      | Xenogenic       | CIA, with booster, IV, Multiple | Mouse | IgG                     |
| #Gonzalez, et al (2009) <sup>S21</sup>     | 1   | Y               | Y          | AD         | Human  | PBS/ Other | Xenogenic       | CIA, with booster, IP, Multiple | Mouse | IgG, IgG1, IgG2a        |
| #Bouffi, et al (2010) <sup>S23</sup>       | 1   | Y               | Y          | BM         | Murine | N/A        | Allogeneic      | CIA, with booster, IV, Multiple | Mouse | 9-10w                   |
| Schurgers, et al (2010) <sup>S25</sup>     | 1   | N               | N          | BM         | Murine | PBS        | Autologous      | CIA, no booster, IV, Single     | Mouse | IgG                     |
| Liu, et al (2015) <sup>S26</sup>           | 1   | Y               | Y          | UC         | Human  | PBS        | Xenogenic       | CIA, with booster, IV, Single   | Mouse | IgG, Ig M               |
| Choi, et al (2008) <sup>S27</sup>          | 1   | N               | N          | BM         | Murine | PBS        | Autologous      | CIA, with booster, IV, Multiple | Mouse | IgG                     |
| Parolini, et al (2014) <sup>S29</sup>      | 1   | Y               | Y          | Other (AM) | Human  | PBS        | Xenogenic       | CIA, with booster, IP, Multiple | Mouse | IgG, IgG1, IgG2a        |
| Choi, et al (2016) <sup>S32</sup>          | 1   | Y               | Y          | AD         | Human  | PBS        | Xenogenic       | CIA, with booster, IV, Multiple | Mouse | N/A                     |
| #Luz-Crawford, et al (2015) <sup>S33</sup> | 1   | Y               | Y          | BM         | Murine | PBS/ Other | Allogeneic      | CIA, with booster, IV, Multiple | Mouse | IgG2a, IgG1             |
| Luo, et al (2019) <sup>S36</sup>           | 1   | Y               | Y          | Other (GI) | Human  | Nil        | Xenogenic       | CIA, IV, Single                 | Mouse | IgG, IgG1, IgG2a, IgG2b |
|                                            | 2   | Y               | Y          | Other (GI) | Human  | Nil        | Xenogenic       | CIA, IV, Single                 | Mouse | IgG, IgG1, IgG2a, IgG2b |

|                                              |   |   |   |    |       |        |           |                                 |       |     |
|----------------------------------------------|---|---|---|----|-------|--------|-----------|---------------------------------|-------|-----|
| Mancheño-Corvo, et al, (2017) <sup>S44</sup> | 1 | Y | Y | AD | Human | Ringer | Xenogenic | CIA, with booster, IL, Multiple | Mouse | IgG |
|                                              | 2 | Y | Y | AD | Human | Ringer | Xenogenic | CIA, with booster, IL, Multiple | Mouse | IgG |
|                                              | 3 | N | N | AD | Human | Ringer | Xenogenic | CIA, with booster, IV, Multiple | Mouse | IgG |
| Sun, et al, (2017) <sup>S50</sup>            | 1 | N | Y | UC | Human | PBS    | Xenogenic | CIA, with booster, IP, Single   | Mouse | IgG |

Table S2: Summary of meta-regression statistics

| Covariate(s) included                              | $\tau^2$ | R <sup>2</sup> | Test for moderator ( <i>p</i> -value) | Interaction test ( <i>p</i> -value) |
|----------------------------------------------------|----------|----------------|---------------------------------------|-------------------------------------|
| No regression                                      | 0.1542   | N/A            | N/A                                   | N/A                                 |
| Treatment dosage (A)                               | 0.1505   | 1.25%          | 0.2078                                | N/A                                 |
| Number of injections (B)                           | 0.1294   | 15.08%         | 0.0147                                | N/A                                 |
| MSC tissue of origin (C)                           | 0.1104   | 27.58%         | 0.0315                                | N/A                                 |
| Donor species (D)                                  | 0.1030   | 32.43%         | 0.0006                                | N/A                                 |
| Transplant types (E)                               | 0.1035   | 32.11%         | 0.0006                                | N/A                                 |
| Routes of administration (F)                       | 0.1393   | 8.58%          | 0.1383                                | N/A                                 |
| A and B                                            | 0.1307   | 14.26%         | 0.0332                                | N/A                                 |
| A and B with interaction                           | 0.1221   | 19.91%         | 0.0205                                | 0.0722                              |
| C and D                                            | 0.0966   | 36.60%         | 0.0132                                | N/A                                 |
| C and D with interaction                           | 0.0854   | 43.94%         | 0.0052                                | 0.0413                              |
| A and B with interaction, C, D and E (Final model) | 0.0639   | 58.04%         | 0.0017                                | N/A                                 |

A simple mixed-effects model linear regression was used. Normalised clinical score was the dependent variable. Moderators were added to the model through addition, while potential interaction terms were also added if necessary.  $\tau^2$  is the estimation between study variance, and R<sup>2</sup> is the percentage of variance that has been accounted for by the regression model.

Table S3: Meta-regression of the effect of treatment dosage with subgroup of number of injections

| Subgrouping strategy | $\tau^2$ | R <sup>2</sup> | Test for moderator ( <i>p</i> -value) | Significance of adding quadratic term test ( <i>p</i> -value) |
|----------------------|----------|----------------|---------------------------------------|---------------------------------------------------------------|
| Single injection     |          |                |                                       |                                                               |
| Linear regression    | 0.1645   | 14.78%         | 0.1043                                | 0.9370                                                        |
| Quadratic regression | 0.1643   | 14.85%         | 0.2786                                |                                                               |
| Multiple injection   |          |                |                                       |                                                               |
| Linear regression    | 0.0520   | 2.34%          | 0.7041                                | 0.0391                                                        |
| Quadratic regression | 0.0346   | 35.03%         | 0.1339                                |                                                               |

Testing the non-linear effect of treatment dosage on normalised clinical score differences with mixed-effects model regression.  $\tau^2$  is the estimation between study variance, and  $R^2$  is the percentage of variance that has been accounted for by the regression model.

Table S4: Results of clinical studies using MSC to treat RA

| Study                                    | Wang, et.al. (2013)                                                                                       | Wang, et.al. (2016)                                                                | Liang, et.al. (2012)                                                                  | Álvarez-Gracia, et.al. (2017)                                                                                                                       | Ghoryani, et.al. (2019)                                                                 | Park, et.al. (2018)                                                                                                           | Shadmanfar, et.al. (2018)                                                                                  |
|------------------------------------------|-----------------------------------------------------------------------------------------------------------|------------------------------------------------------------------------------------|---------------------------------------------------------------------------------------|-----------------------------------------------------------------------------------------------------------------------------------------------------|-----------------------------------------------------------------------------------------|-------------------------------------------------------------------------------------------------------------------------------|------------------------------------------------------------------------------------------------------------|
| <b>Clinical Phase</b>                    | 1/2                                                                                                       | Pilot                                                                              | Pilot                                                                                 | 1/2                                                                                                                                                 | N/A                                                                                     | 1                                                                                                                             | 1/2                                                                                                        |
| <b>Study Population</b>                  | Subjects with Active RA                                                                                   | Subjects with JIA                                                                  | Subjects with Refractory RA                                                           | Subjects with Refractory RA                                                                                                                         | Subjects with Refractory RA                                                             | Subjects with Active RA                                                                                                       | Subjects with knee involved RA                                                                             |
| <b>Primary Objective</b>                 | Safety and Efficacy                                                                                       | Safety and Efficacy                                                                | Safety and Efficacy                                                                   | Safety, Tolerability and Efficacy                                                                                                                   | Safety and Efficacy                                                                     | Safety and Tolerability                                                                                                       | Safety and Efficacy                                                                                        |
| <b>Primary Endpoint</b>                  | Primary: Safety (Prevalence of AEs)<br>Secondary: ACR20, ACR50, ACR 70, DAS28, HAQ-DI at month 3, 6 and 8 | Primary: Safety (Prevalence of AEs)<br>Secondary: DAS28. ESR, CRP at month 3 and 6 | VAS pain score, DAS28, EULAR, CRP, ESR at month 1, 3, 6, 12, and then every half year | Primary: Safety (Prevalence of AEs)<br>Secondary: ACR20, ACR50, ACR 70, DAS28-ESR, CRP, SF-36 every month until Month 3                             | DAS28-ESR, VAS, ESR, CRP, RF, anti-CCP, measure immunological factors at month 1, 6, 12 | Primary: Safety (Prevalence of AEs)<br>Secondary: DAS28, WOMAC score, VAS at month 3, 6, 12                                   | Primary: Safety (Prevalence of AEs)<br>Secondary: DAS28, HAQ, VAS, ESR at Week 4                           |
| <b>Trial Design</b>                      | Open label                                                                                                | Open label                                                                         | N/A                                                                                   | Randomised, Multicentre, Double blind, Placebo-controlled                                                                                           | N/A                                                                                     | Open label                                                                                                                    | Randomised, Triple-blind, Single-centre, Placebo-controlled                                                |
| <b>Control Arm</b>                       | Placebo                                                                                                   | None                                                                               | None                                                                                  | Placebo                                                                                                                                             | None                                                                                    | None                                                                                                                          | Placebo                                                                                                    |
| <b>Random Scheme</b>                     | None                                                                                                      | None                                                                               | N/A                                                                                   | Randomised, 3:1 test article to placebo                                                                                                             | N/A                                                                                     | None                                                                                                                          | Block (Size 4) randomisation                                                                               |
| <b>Blinding</b>                          | None                                                                                                      | None                                                                               | N/A                                                                                   | Single blinded for safety; Double blinded for efficacy                                                                                              | N/A                                                                                     | None                                                                                                                          | Triple blinded                                                                                             |
| <b>Patients Enrolled</b>                 | 172                                                                                                       | 10                                                                                 | 4                                                                                     | 67                                                                                                                                                  | 9                                                                                       | 9                                                                                                                             | 30                                                                                                         |
| <b>Patients Treated with Active Drug</b> | 136                                                                                                       | 10                                                                                 | 4                                                                                     | 42                                                                                                                                                  | 9                                                                                       | 9                                                                                                                             | 15                                                                                                         |
| <b>Number of sites</b>                   | 1                                                                                                         | 1                                                                                  | 1                                                                                     | 18                                                                                                                                                  | 1                                                                                       | 1                                                                                                                             | 1                                                                                                          |
| <b>Route of Delivery</b>                 | IV                                                                                                        | IV                                                                                 | IV                                                                                    | IV                                                                                                                                                  | IV                                                                                      | IV                                                                                                                            | Intra-articular                                                                                            |
| <b>Dose(s)</b>                           | $4.0 \times 10^7$ cells / infusion, single or two IV infusion(s)                                          | $4.0 \times 10^7$ cells / infusion, two IV infusions                               | $1.0 \times 10^6$ /kg, IV infusions                                                   | $1.0 \times 10^6$ /kg/infusion (Cohort A), $2.0 \times 10^6$ /kg/infusion (Cohort B), $4.0 \times 10^6$ /kg/infusion (Cohort C), three IV infusions | $1.0 \times 10^6$ /kg/ infusion, single IV infusion                                     | $2.5 \times 10^7$ cells /infusion, $5.0 \times 10^7$ cells /infusion or $1.0 \times 10^8$ cells /infusion, single IV infusion | $42 \pm 4 \times 10^6$ cells /injection, single injection to knee joint                                    |
| <b>Outcomes / Major Findings</b>         | Six cases of 136 patients (4%) showing mild flu-like symptoms during the infusion. No other               | No AEs were observed after MSC infusion. 7 patients (70%, 7/10) achieved           | 3 of 4 patients achieved a reduction in ESR, DAS28, and pain VAS score at 1 and 6     | Only 1 of the 8 AE grade 3 from 53 patients is serious. Significant increased ACR 20 response rate                                                  | Significant reduction in DAS28-ESR. VAS score showed significant                        | DAS-28 reduced $1.60 \pm 1.57$ . Reduced levels of IL-1 $\beta$ , IL-6, IL-8, and TNF- $\alpha$ at 24                         | No adverse effects reported. Achieved superior findings according to WOMAC, VAS, time to jelling and pain- |

|  |                                                                                         |                                  |                                                                                                                                                                                                                           |  |                                                                                                  |                                                                                       |                                                                                         |
|--|-----------------------------------------------------------------------------------------|----------------------------------|---------------------------------------------------------------------------------------------------------------------------------------------------------------------------------------------------------------------------|--|--------------------------------------------------------------------------------------------------|---------------------------------------------------------------------------------------|-----------------------------------------------------------------------------------------|
|  | AEs reported. Significant increased ACR 20 response rate and reduction in DAS28, HAQ-DI | DAS28<2.6. Reduction in ESR, CRP | months after administration. 2 of 3 had a EULAR moderate response at 6 months but experienced a relapse at 7 and 23 months, respectively. No one achieved DAS28 remission in the follow-up period. No SAEs were reported. |  | decreasing trend. No significant difference for serum CRP and anti-CCP levels after intervention | hours were observed. The HAQ score and pain VAS changes at week 4 were (-0.15 ± 0.48) | free walking distance. The improvement cannot be significantly sustained over 12 months |
|--|-----------------------------------------------------------------------------------------|----------------------------------|---------------------------------------------------------------------------------------------------------------------------------------------------------------------------------------------------------------------------|--|--------------------------------------------------------------------------------------------------|---------------------------------------------------------------------------------------|-----------------------------------------------------------------------------------------|

## REFERENCES

- 1 Zhou, B. *et al.* Administering human adipose-derived mesenchymal stem cells to prevent and treat experimental arthritis. *Clin Immunol* **141**, 328-337, doi:10.1016/j.clim.2011.08.014 (2011).
- 2 Garimella, M. G. *et al.* Adipose-Derived Mesenchymal Stem Cells Prevent Systemic Bone Loss in Collagen-Induced Arthritis. *J Immunol* **195**, 5136-5148, doi:10.4049/jimmunol.1500332 (2015).
- 3 Chen, M. *et al.* Adoptive transfer of human gingiva-derived mesenchymal stem cells ameliorates collagen-induced arthritis via suppression of Th1 and Th17 cells and enhancement of regulatory T cell differentiation. *Arthritis Rheum* **65**, 1181-1193, doi:10.1002/art.37894 (2013).
- 4 Lee, W. J. *et al.* Cell source-dependent in vivo immunosuppressive properties of mesenchymal stem cells derived from the bone marrow and synovial fluid of minipigs. *Exp Cell Res* **333**, 273-288, doi:10.1016/j.yexcr.2015.03.015 (2015).
- 5 Augello, A., Tasso, R., Negrini, S. M., Cancedda, R. & Pennesi, G. Cell therapy using allogeneic bone marrow mesenchymal stem cells prevents tissue damage in collagen-induced arthritis. *Arthritis Rheum* **56**, 1175-1186, doi:10.1002/art.22511 (2007).
- 6 Chen, B. *et al.* Flk-1+ mesenchymal stem cells aggravate collagen-induced arthritis by up-regulating interleukin-6. *Clin Exp Immunol* **159**, 292-302, doi:10.1111/j.1365-2249.2009.04069.x (2010).
- 7 Lopez-Santalla, M. *et al.* Human Adipose-Derived Mesenchymal Stem Cells Modulate Experimental Autoimmune Arthritis by Modifying Early Adaptive T Cell Responses. *Stem Cells* **33**, 3493-3503, doi:10.1002/stem.2113 (2015).
- 8 Greish, S. *et al.* Human umbilical cord mesenchymal stem cells as treatment of adjuvant rheumatoid arthritis in a rat model. *World J Stem Cells* **4**, 101-109, doi:10.4252/wjsc.v4.i10.101 (2012).
- 9 Gonzalo-Gil, E. *et al.* Human embryonic stem cell-derived mesenchymal stromal cells ameliorate collagen-induced arthritis by inducing host-derived indoleamine 2,3 dioxygenase. *Arthritis Res Ther* **18**, 77, doi:10.1186/s13075-016-0979-0 (2016).
- 10 Mao, F. *et al.* Immunosuppressive effects of mesenchymal stem cells in collagen-induced mouse arthritis. *Inflamm Res* **59**, 219-225, doi:10.1007/s00011-009-0090-y (2010).
- 11 Swart, J. F. *et al.* Mesenchymal stem cell therapy in proteoglycan induced arthritis. *Ann Rheum Dis* **74**, 769-777, doi:10.1136/annrheumdis-2013-204147 (2015).
- 12 Papadopoulou, A. *et al.* Mesenchymal stem cells are conditionally therapeutic in preclinical models of rheumatoid arthritis. *Ann Rheum Dis* **71**, 1733-1740, doi:10.1136/annrheumdis-2011-200985 (2012).
- 13 Rui, K. *et al.* Olfactory ecto-mesenchymal stem cells possess immunoregulatory function and suppress autoimmune arthritis. *Cell Mol Immunol* **13**, 401-408, doi:10.1038/cmi.2015.82 (2016).
- 14 Djouad, F. *et al.* Reversal of the immunosuppressive properties of mesenchymal stem cells by tumor necrosis factor alpha in collagen-induced arthritis. *Arthritis Rheum* **52**, 1595-1603, doi:10.1002/art.21012 (2005).
- 15 Santos, J. M. *et al.* The role of human umbilical cord tissue-derived mesenchymal stromal cells (UCX(R)) in the treatment of inflammatory arthritis. *J Transl Med* **11**, 18, doi:10.1186/1479-5876-11-18 (2013).
- 16 Wu, C. C., Wu, T. C., Liu, F. L., Sytwu, H. K. & Chang, D. M. TNF-alpha inhibitor reverse the effects of human umbilical cord-derived stem cells on experimental arthritis by increasing immunosuppression. *Cell Immunol* **273**, 30-40, doi:10.1016/j.cellimm.2011.11.009 (2012).
- 17 Kim, J. H. *et al.* Paradoxical effects of human adipose tissue-derived mesenchymal stem cells on progression of experimental arthritis in SKG mice. *Cell Immunol* **292**, 94-101, doi:10.1016/j.cellimm.2014.10.005 (2014).
- 18 Liu, Y. *et al.* Therapeutic potential of human umbilical cord mesenchymal stem cells in the treatment of rheumatoid arthritis. *Arthritis Res Ther* **12**, R210, doi:10.1186/ar3187 (2010).

- 19 Shu, J. *et al.* Transplantation of human amnion mesenchymal cells attenuates the disease development in rats with collagen-induced arthritis. *Clin Exp Rheumatol* **33**, 484-490 (2015).
- 20 Park, K. H. *et al.* Treatment of Collagen-Induced Arthritis Using Immune Modulatory Properties of Human Mesenchymal Stem Cells. *Cell Transplant* **25**, 1057-1072, doi:10.3727/096368915X687949 (2016).
- 21 Gonzalez, M. A., Gonzalez-Rey, E., Rico, L., Buscher, D. & Delgado, M. Treatment of experimental arthritis by inducing immune tolerance with human adipose-derived mesenchymal stem cells. *Arthritis Rheum* **60**, 1006-1019, doi:10.1002/art.24405 (2009).
- 22 Zhao, C. *et al.* Umbilical Cord-Derived Mesenchymal Stem Cells Inhibit Cadherin-11 Expression by Fibroblast-Like Synoviocytes in Rheumatoid Arthritis. *J Immunol Res* **2015**, 137695, doi:10.1155/2015/137695 (2015).
- 23 Bouffi, C., Bony, C., Courties, G., Jorgensen, C. & Noel, D. IL-6-dependent PGE2 secretion by mesenchymal stem cells inhibits local inflammation in experimental arthritis. *PLoS One* **5**, e14247, doi:10.1371/journal.pone.0014247 (2010).
- 24 Sullivan, C. *et al.* Genetic mismatch affects the immunosuppressive properties of mesenchymal stem cells in vitro and their ability to influence the course of collagen-induced arthritis. *Arthritis Res Ther* **14**, R167, doi:10.1186/ar3916 (2012).
- 25 Schurgers, E., Kelchtermans, H., Mitera, T., Geboes, L. & Matthys, P. Discrepancy between the in vitro and in vivo effects of murine mesenchymal stem cells on T-cell proliferation and collagen-induced arthritis. *Arthritis Res Ther* **12**, R31, doi:10.1186/ar2939 (2010).
- 26 Liu, R. *et al.* Allogeneic mesenchymal stem cells inhibited T follicular helper cell generation in rheumatoid arthritis. *Scient. Rep.* **5**, doi:ARTN 1277710.1038/srep12777 (2015).
- 27 Choi, J. J. *et al.* Mesenchymal stem cells overexpressing interleukin-10 attenuate collagen-induced arthritis in mice. *Clin Exp Immunol* **153**, 269-276, doi:10.1111/j.1365-2249.2008.03683.x (2008).
- 28 Park, M. J. *et al.* Transforming growth factor beta-transduced mesenchymal stem cells ameliorate experimental autoimmune arthritis through reciprocal regulation of Treg/Th17 cells and osteoclastogenesis. *Arthritis Rheum* **63**, 1668-1680, doi:10.1002/art.30326 (2011).
- 29 Parolini, O. *et al.* Therapeutic Effect of Human Amniotic Membrane-Derived Cells on Experimental Arthritis and Other Inflammatory Disorders. *Arthritis & Rheumatology* **66**, 327-339, doi:10.1002/art.38206 (2014).
- 30 Sullivan, C. *et al.* Allogeneic Murine Mesenchymal Stem Cells: Migration to Inflamed Joints In Vivo and Amelioration of Collagen Induced Arthritis When Transduced to Express CTLA4Ig. *Stem Cells and Development* **22**, 3203-3213, doi:10.1089/scd.2013.0248 (2013).
- 31 El-denshary, E. S. M., Rashed, L. A. & Elhussiny, M. Mesenchymal stromal cells versus betamethasone can dampen disease activity in the collagen arthritis mouse model. *Clinical and Experimental Medicine* **14**, 285-295, doi:10.1007/s10238-013-0248-3 (2013).
- 32 Choi, E. W. *et al.* Effects of Transplantation of CTLA4Ig-Overexpressing Adipose Tissue-Derived Mesenchymal Stem Cells in Mice With Sustained Severe Rheumatoid Arthritis. *Cell Transplantation* **25**, 243-259, doi:10.3727/096368915x688470 (2016).
- 33 Luz-Crawford, P. *et al.* Glucocorticoid-Induced Leucine Zipper Governs the Therapeutic Potential of Mesenchymal Stem Cells by Inducing a Switch From Pathogenic to Regulatory Th17 Cells in a Mouse Model of Collagen-Induced Arthritis. *Arthritis & Rheumatology* **67**, 1514-1524, doi:10.1002/art.39069 (2015).
- 34 Kehoe, O., Cartwright, A., Askari, A., El Haj, A. J. & Middleton, J. Intra-articular injection of mesenchymal stem cells leads to reduced inflammation and cartilage damage in murine antigen-induced arthritis. *Journal of Translational Medicine* **12**, doi:Artn 157 10.1186/1479-5876-12-157 (2014).
- 35 Gu, Y. & Shi, S. Transplantation of gingiva-derived mesenchymal stem cells ameliorates collagen-induced arthritis. *Arthritis Res Ther* **18**, 262 (2016).

- 36 Luo, Y. et al. Human gingival tissue-derived MSC suppress osteoclastogenesis and bone erosion via CD39-adenosine signal pathway in autoimmune arthritis. *EBioMedicine* **43**, 620-631 (2019).
- 37 Nam, Y. et al. Intraperitoneal infusion of mesenchymal stem cell attenuates severity of collagen antibody induced arthritis. *PLoS One* **13**, e0198740 (2018).
- 38 Park, N. et al. Etanercept-Synthesising Mesenchymal Stem Cells Efficiently Ameliorate Collagen-Induced Arthritis. *Sci Rep* **7**, 39593 (2017).
- 39 Shin, T.H. et al. Human umbilical cord blood-stem cells direct macrophage polarization and block inflammasome activation to alleviate rheumatoid arthritis. *Cell Death Dis* **7**, e2524 (2016).
- 40 Feng, Z. et al. Loss of A20 in BM-MSCs regulates the Th17/Treg balance in Rheumatoid Arthritis. *Sci Rep* **8**, 427 (2018).
- 41 Zhang, Q. et al. Comparison of therapeutic effects of different mesenchymal stem cells on rheumatoid arthritis in mice. *PeerJ* **7**, e7023 (2019).
- 42 Tian, S., Yan, Y., Qi, X., Li, X. & Li, Z. Treatment of Type II Collagen-Induced Rat Rheumatoid Arthritis Model by Interleukin 10 (IL10)-Mesenchymal Stem Cells (BMSCs). *Med Sci Monit* **25**, 2923-2934 (2019).
- 43 Abd-Elhalem, S.S., Haggag, N.Z. & El-Shinnawy, N.A. Bone marrow mesenchymal stem cells suppress IL-9 in adjuvant-induced arthritis. *Autoimmunity* **51**, 25-34 (2018).
- 44 Mancheno-Corvo, P. et al. Intralymphatic Administration of Adipose Mesenchymal Stem Cells Reduces the Severity of Collagen-Induced Experimental Arthritis. *Front Immunol* **8**, 462 (2017).
- 45 Li, R. et al. Synergistic suppression of autoimmune arthritis through concurrent treatment with tolerogenic DC and MSC. *Sci Rep* **7**, 43188 (2017).
- 46 Yan, M. et al. Intra-Articular Injection of Human Synovial Membrane-Derived Mesenchymal Stem Cells in Murine Collagen-Induced Arthritis: Assessment of Immunomodulatory Capacity In Vivo. *Stem Cells Int* **2017**, 9198328 (2017).
- 47 Sun, Y. et al. Comparable therapeutic potential of umbilical cord mesenchymal stem cells in collagen-induced arthritis to TNF inhibitor or anti-CD20 treatment. *Clin Exp Rheumatol* **35**, 288-295 (2017).
- 48 Yu, Y. et al. Therapeutic effect of long-interval repeated intravenous administration of human umbilical cord blood-derived mesenchymal stem cells in DBA/1 mice with collagen-induced arthritis. *J Tissue Eng Regen Med* (2019).
- 49 Hooijmans, C. R. et al. SYRCLE's risk of bias tool for animal studies. *BMC Medical Research Methodology* **14**, doi:10.1186/1471-2288-14-43 (2014).
- 50 Moher, D., Liberati, A., Tetzlaff, J., Altman, D. G. & Group, P. Preferred reporting items for systematic reviews and meta-analyses: the PRISMA statement. *PLoS medicine* **6**, e1000097 (2009).
